# Supplementary material for: Microbiome Responses to Fecal Microbiota Transplantation in Cats with Chronic Digestive Issues
Source: MDPI journal article supplement (doi:10.3390/vetsci10090561), 2023-09-06
Supplement: s1 [file s1]

## SUPPLEMENTARY FIGURES FOR:

### Microbiome responses to fecal microbiota transplantation in cats with chronic digestive issues

Connie A. Rojas<sup>1,2</sup>, Zhandra Entrolezo<sup>3</sup>, Jessica Jarett<sup>3</sup>, Guillaume Jospin<sup>3</sup>, Dawn Kingsbury<sup>3</sup>, Alex Martin<sup>3</sup>, Jonathan A. Eisen<sup>1,2</sup>, Holly H. Ganz<sup>3</sup>

<sup>1</sup> Genome Center, University of California – Davis, Davis, California, USA

<sup>2</sup> Department of Evolution and Ecology, University of California – Davis, Davis, California, USA

<sup>3</sup> AnimalBiome, Oakland, CA, USA

**Fig S1. Fecal microbiome composition before and after FMT for the forty-six FMT recipients.** Plots showing the relative frequencies of 16S rRNA gene sequences assigned to bacterial genera with mean relative abundances > 1.65%, while all other genera are clumped into an “Other” category.

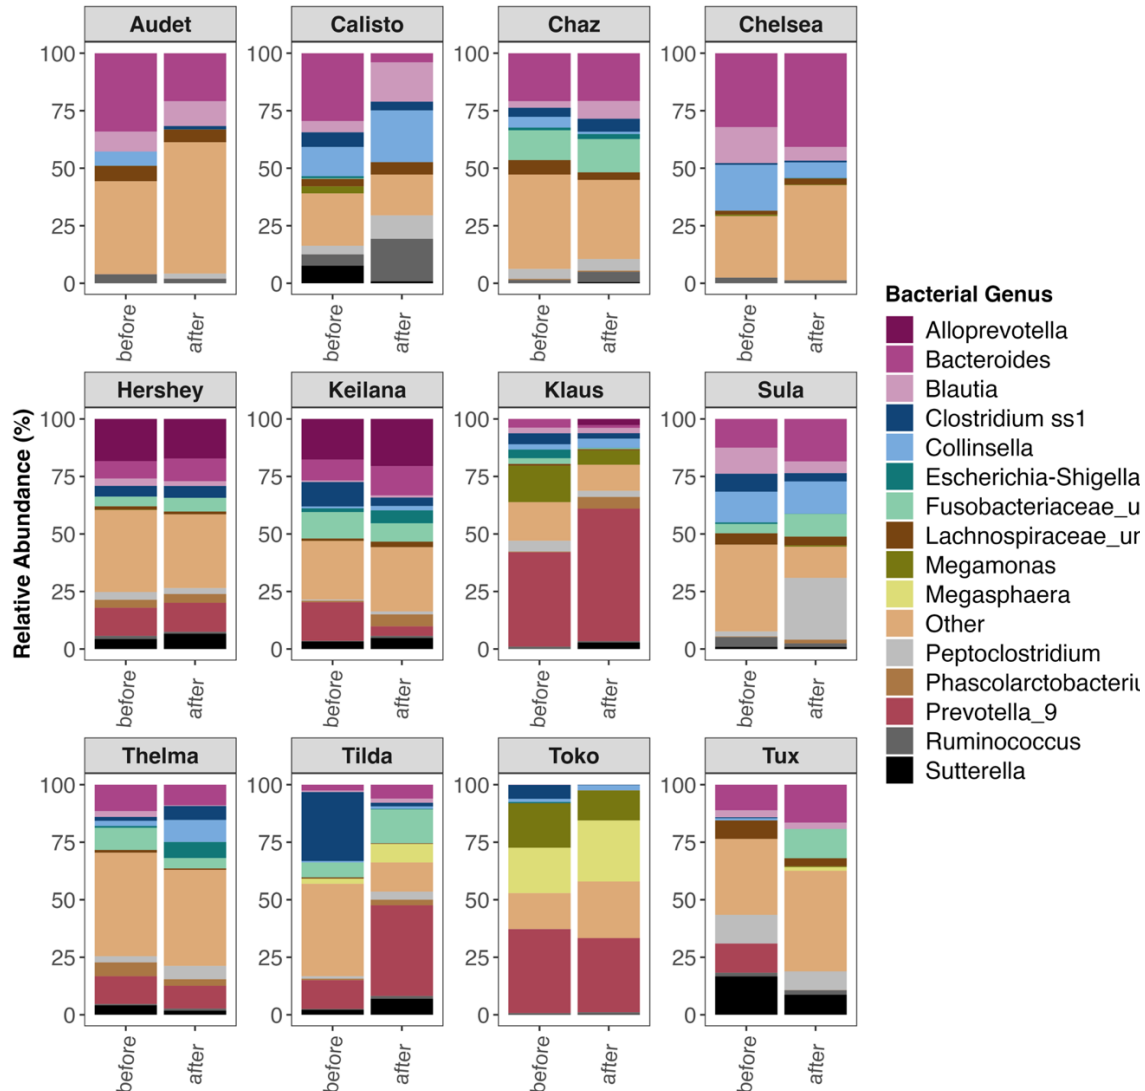

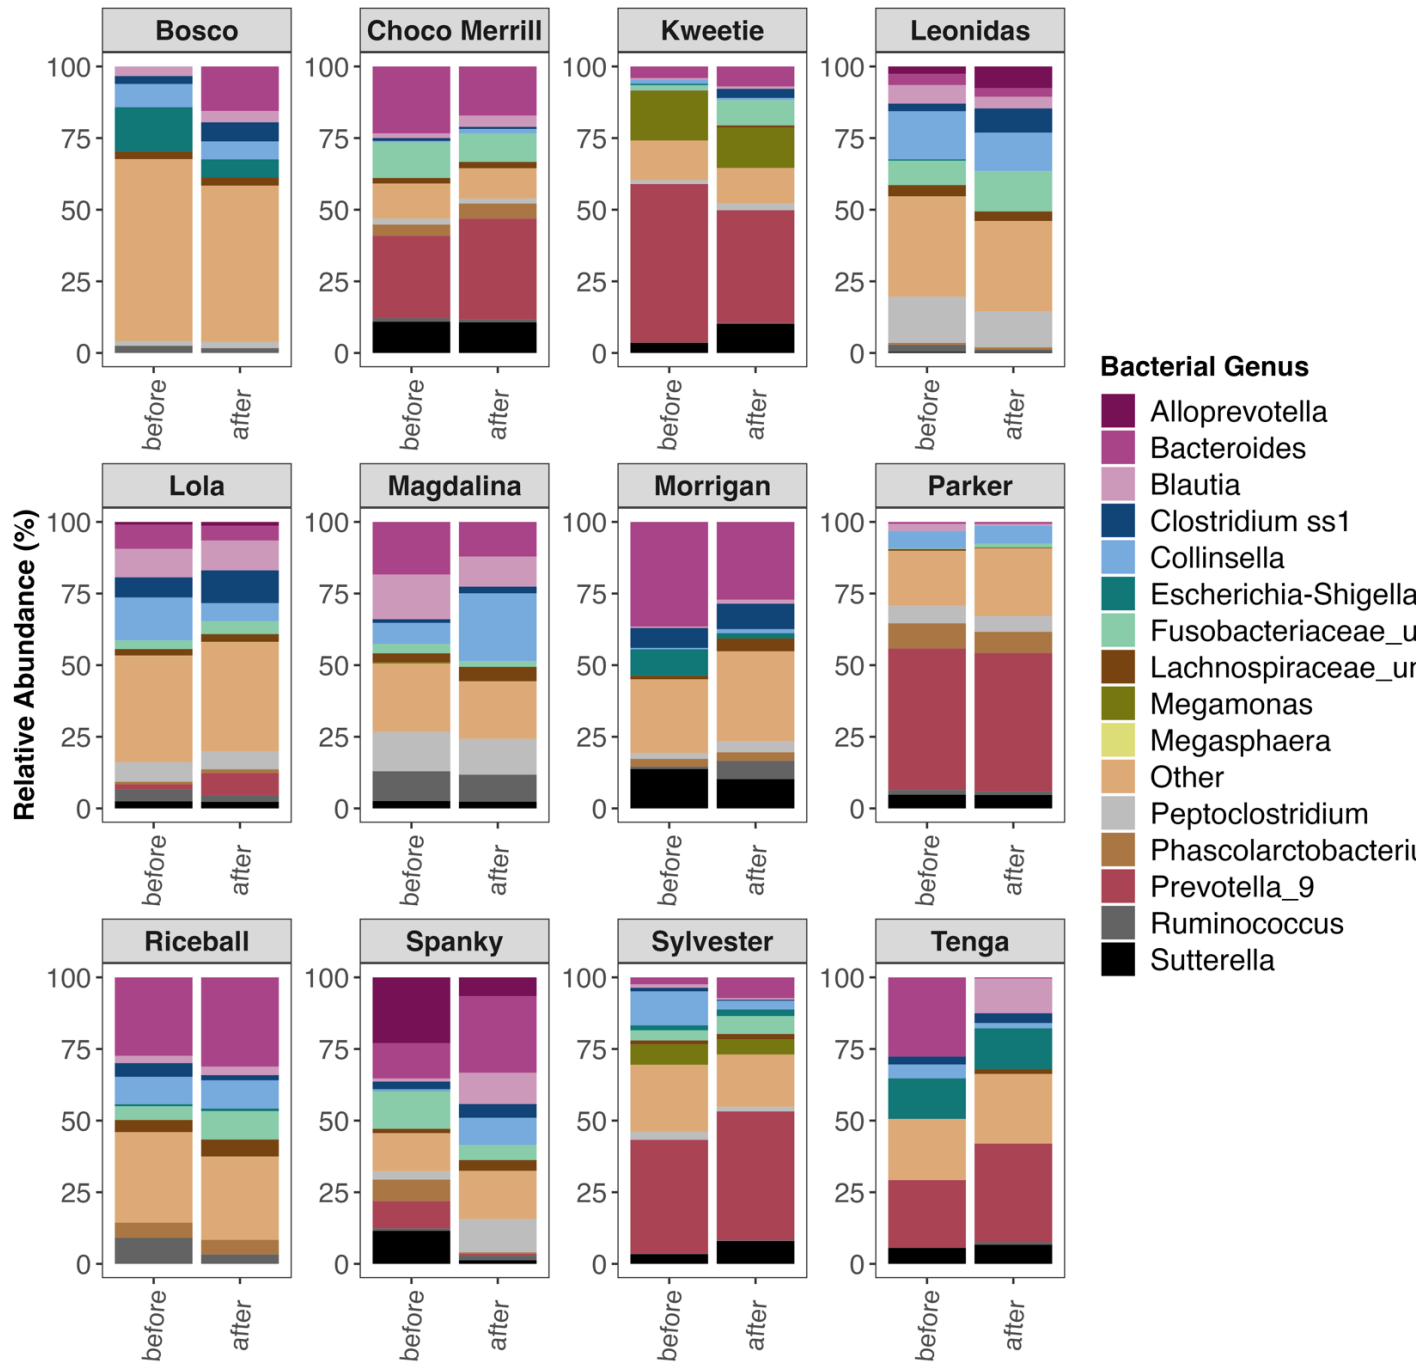

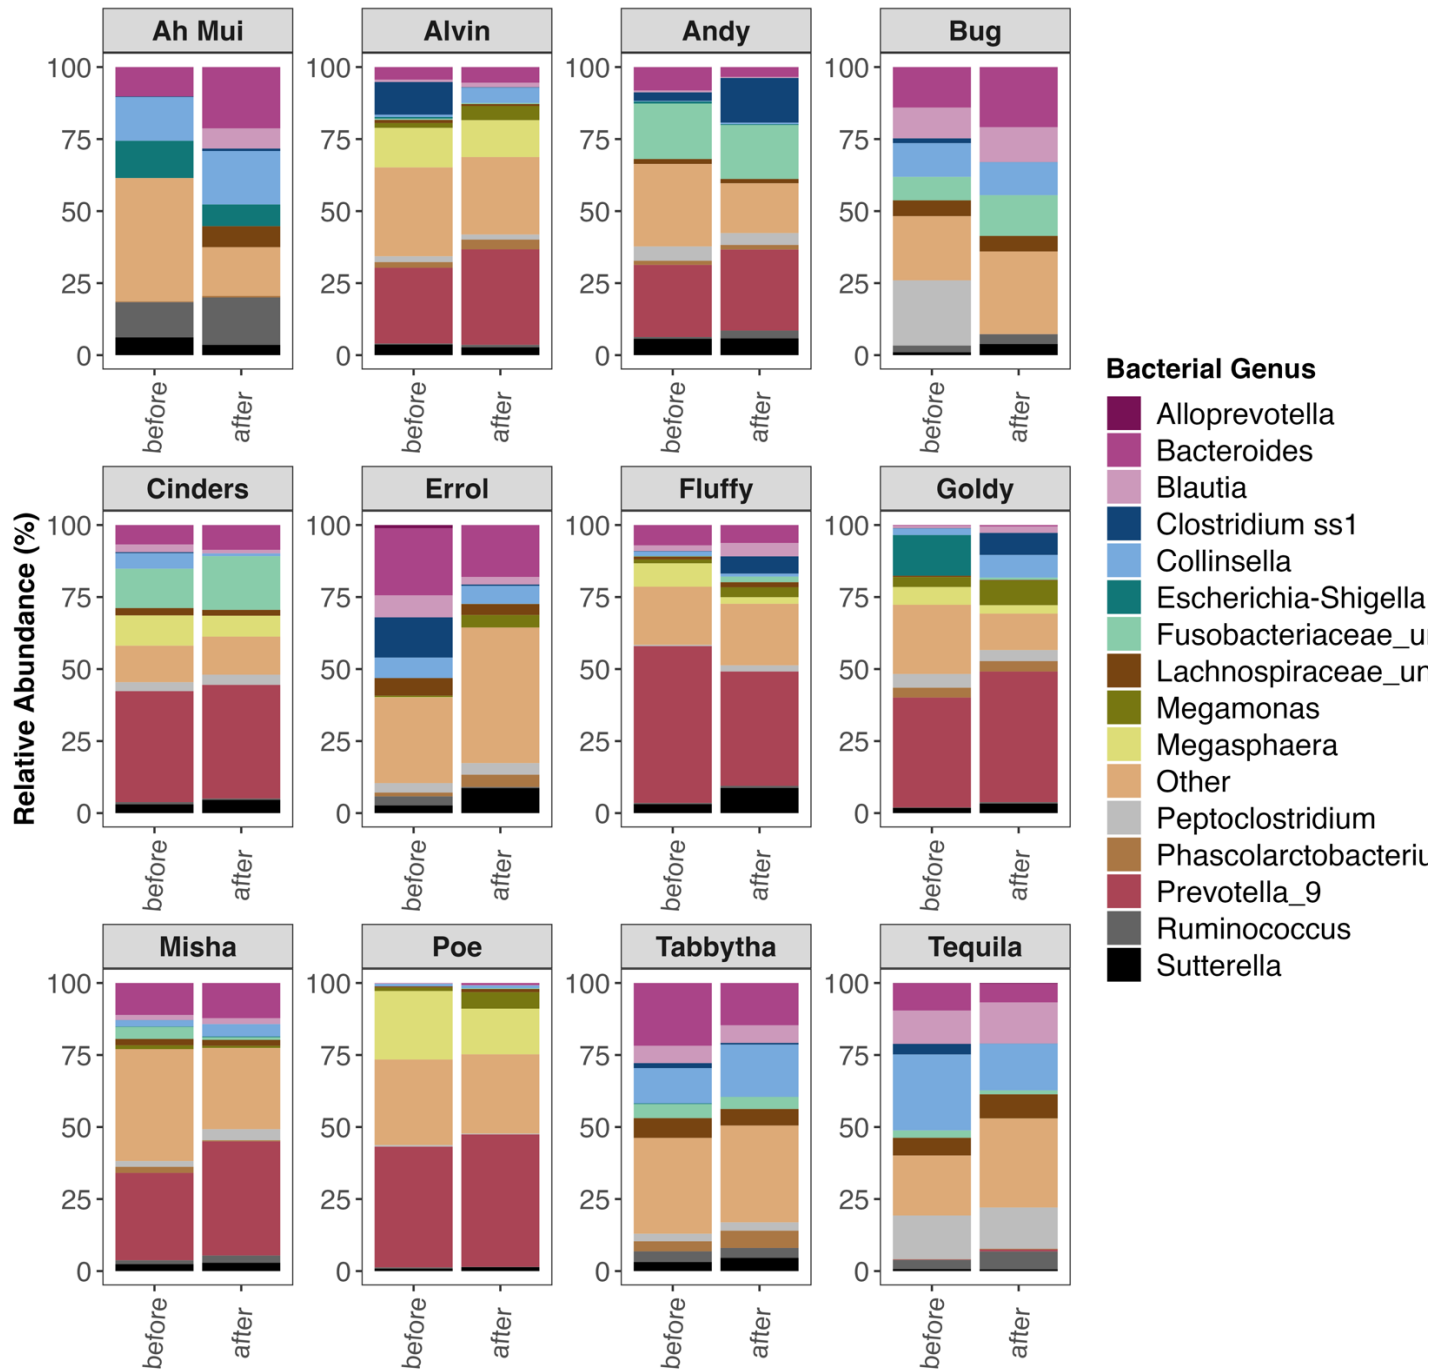

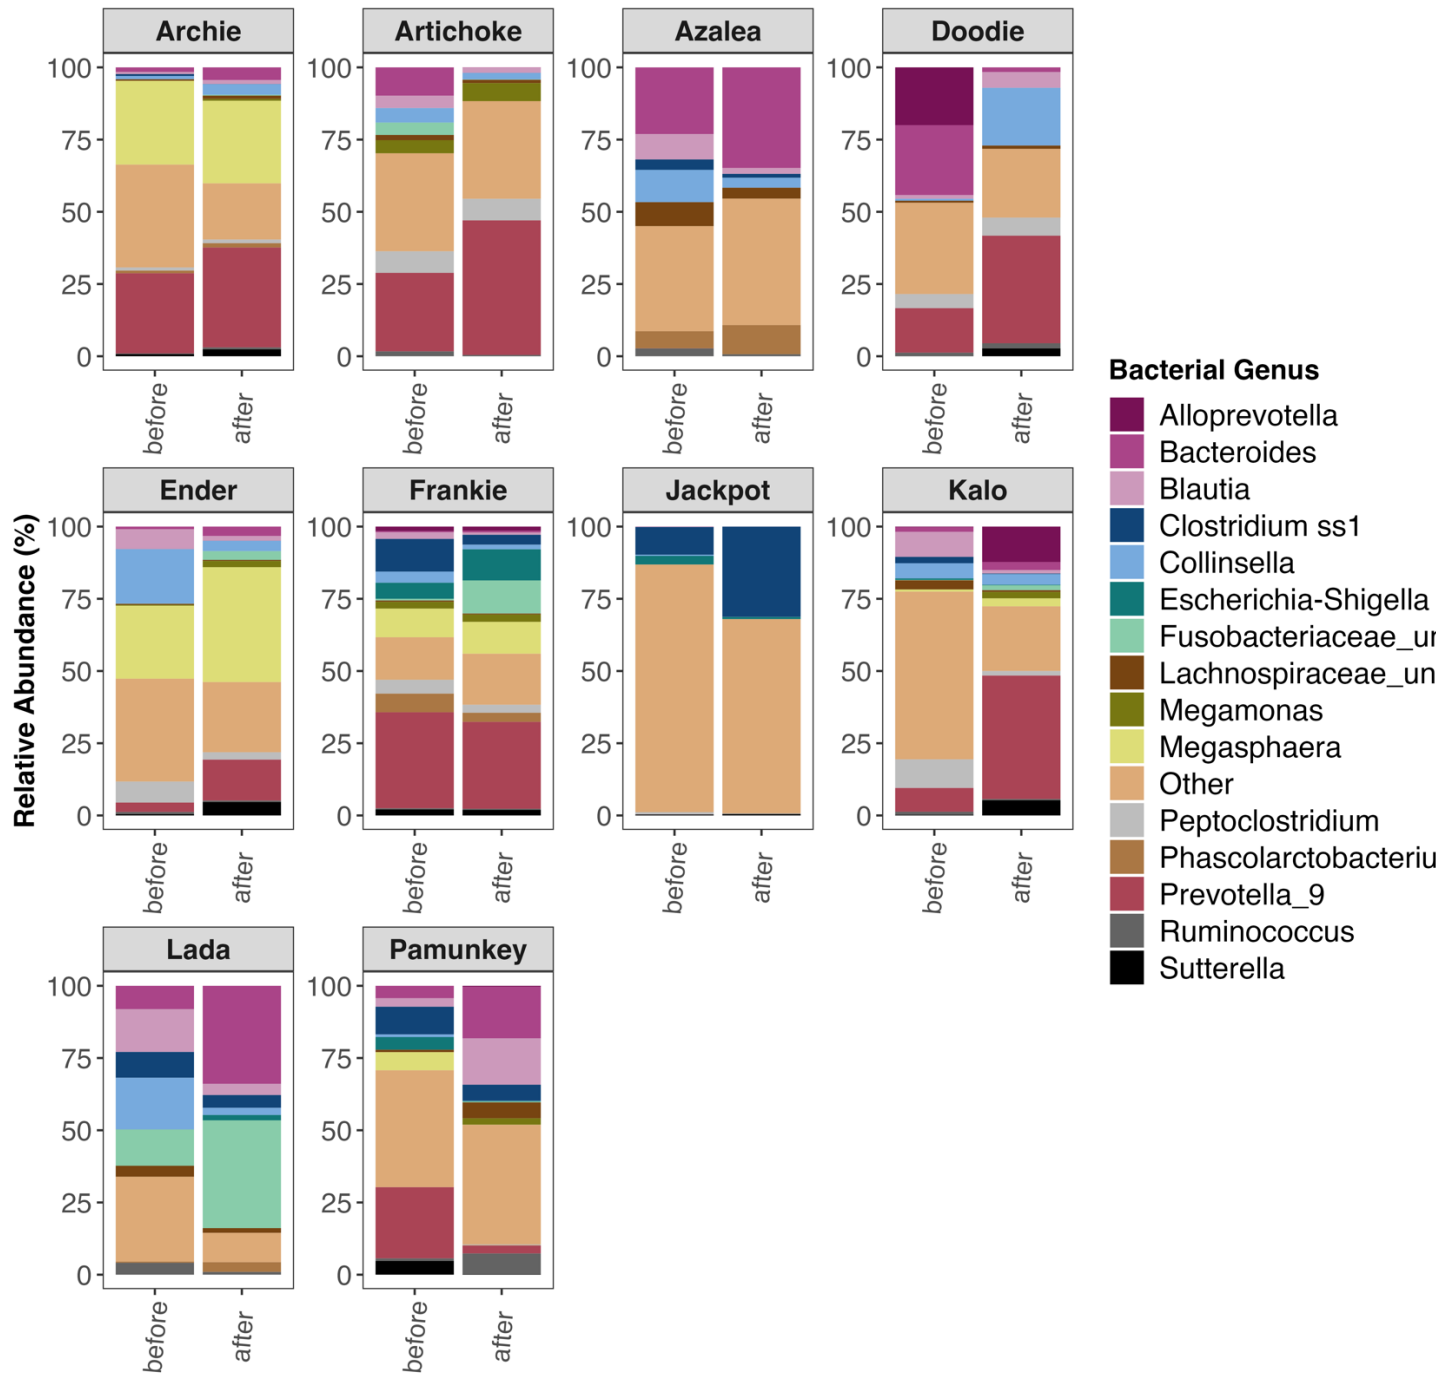

**Fig S2. Posthoc testing of bacterial genera that were found to significantly correlate with host predictors according to a linear model.** A-D) Posthoc testing of bacterial relative abundances ~ clinical symptoms, E-G) Posthoc testing of bacterial relative abundances ~ response to FMT, H) Posthoc testing of bacterial relative abundances ~ prior antibiotic use, and I) Posthoc testing of bacterial relative abundances ~ Dry kibble consumption. Tukey contrasts were used.

**A) GLM  $\Delta$  Relative Abundance of Clostridium ~ Clinical signs**

| Linear Hypotheses:                                            |          |            |         |          |
|---------------------------------------------------------------|----------|------------|---------|----------|
|                                                               | Estimate | Std. Error | z value | Pr(> z ) |
| Diarrhea - Constipation == 0                                  | -0.8888  | 2.9916     | -0.297  | 0.9905   |
| VomConstip - Constipation == 0                                | -4.6916  | 4.2027     | -1.116  | 0.6709   |
| VomDiarr - Constipation == 0                                  | 4.6072   | 3.1022     | 1.485   | 0.4362   |
| VomConstip - Diarrhea == 0                                    | -3.8027  | 3.7594     | -1.012  | 0.7352   |
| VomDiarr - Diarrhea == 0                                      | 5.4960   | 2.3325     | 2.356   | 0.0816 . |
| VomDiarr - VomConstip == 0                                    | 9.2987   | 3.9539     | 2.352   | 0.0825 . |
| ---                                                           |          |            |         |          |
| Signif. codes: 0 '***' 0.001 '**' 0.01 '*' 0.05 '.' 0.1 ' ' 1 |          |            |         |          |
| (Adjusted p values reported -- single-step method)            |          |            |         |          |

**B) GLM  $\Delta$  Relative Abundance of Collinsella ~ Clinical signs**

| Linear Hypotheses:                                            |          |            |         |          |
|---------------------------------------------------------------|----------|------------|---------|----------|
|                                                               | Estimate | Std. Error | z value | Pr(> z ) |
| Diarrhea - Constipation == 0                                  | -4.349   | 2.899      | -1.500  | 0.4271   |
| VomConstip - Constipation == 0                                | -7.245   | 4.072      | -1.779  | 0.2743   |
| VomDiarr - Constipation == 0                                  | -8.457   | 3.006      | -2.813  | 0.0237 * |
| VomConstip - Diarrhea == 0                                    | -2.896   | 3.643      | -0.795  | 0.8519   |
| VomDiarr - Diarrhea == 0                                      | -4.109   | 2.260      | -1.818  | 0.2562   |
| VomDiarr - VomConstip == 0                                    | -1.212   | 3.831      | -0.316  | 0.9886   |
| ---                                                           |          |            |         |          |
| Signif. codes: 0 '***' 0.001 '**' 0.01 '*' 0.05 '.' 0.1 ' ' 1 |          |            |         |          |
| (Adjusted p values reported -- single-step method)            |          |            |         |          |

### C) GLM $\Delta$ Relative Abundance of *Negativibacillus* ~ Clinical signs

Linear Hypotheses:

|                                | Estimate | Std. Error | z value | Pr(> z )   |
|--------------------------------|----------|------------|---------|------------|
| Diarrhea - Constipation == 0   | -0.4215  | 0.7521     | -0.560  | 0.94157    |
| VomConstip - Constipation == 0 | 2.4778   | 1.0565     | 2.345   | 0.08423 .  |
| VomDiarr - Constipation == 0   | -0.8434  | 0.7799     | -1.082  | 0.69261    |
| VomConstip - Diarrhea == 0     | 2.8993   | 0.9451     | 3.068   | 0.01104 *  |
| VomDiarr - Diarrhea == 0       | -0.4219  | 0.5864     | -0.720  | 0.88547    |
| VomDiarr - VomConstip == 0     | -3.3212  | 0.9940     | -3.341  | 0.00481 ** |

---

Signif. codes: 0 '\*\*\*' 0.001 '\*\*' 0.01 '\*' 0.05 '.' 0.1 ' ' 1

(Adjusted p values reported -- single-step method)

### D) GLM $\Delta$ Relative Abundance of *Subdoligranulum* ~ Clinical signs

Linear Hypotheses:

|                                | Estimate | Std. Error | z value | Pr(> z )   |
|--------------------------------|----------|------------|---------|------------|
| Diarrhea - Constipation == 0   | 0.3531   | 0.6903     | 0.511   | 0.95471    |
| VomConstip - Constipation == 0 | -2.2919  | 0.9698     | -2.363  | 0.08036 .  |
| VomDiarr - Constipation == 0   | 0.6407   | 0.7159     | 0.895   | 0.80131    |
| VomConstip - Diarrhea == 0     | -2.6450  | 0.8675     | -3.049  | 0.01167 *  |
| VomDiarr - Diarrhea == 0       | 0.2876   | 0.5382     | 0.534   | 0.94883    |
| VomDiarr - VomConstip == 0     | 2.9326   | 0.9124     | 3.214   | 0.00687 ** |

---

Signif. codes: 0 '\*\*\*' 0.001 '\*\*' 0.01 '\*' 0.05 '.' 0.1 ' ' 1

(Adjusted p values reported -- single-step method)

### E) GLM $\Delta$ Relative Abundance of *Butyricoccus* ~ Response to FMT

Linear Hypotheses:

|                                | Estimate | Std. Error | z value | Pr(> z ) |
|--------------------------------|----------|------------|---------|----------|
| Responder - Non-Responder == 0 | -0.10298 | 0.05364    | -1.92   | 0.0549 . |

---

Signif. codes: 0 '\*\*\*' 0.001 '\*\*' 0.01 '\*' 0.05 '.' 0.1 ' ' 1

(Adjusted p values reported -- single-step method)

#### F) GLM $\Delta$ Relative Abundance of Megamonas ~ Response to FMT

Linear Hypotheses:

|                                | Estimate | Std. Error | z value | Pr(> z )   |
|--------------------------------|----------|------------|---------|------------|
| Responder - Non-Responder == 0 | 2.108    | 0.782      | 2.696   | 0.00702 ** |

---

Signif. codes: 0 '\*\*\*' 0.001 '\*\*' 0.01 '\*' 0.05 '.' 0.1 ' ' 1

(Adjusted p values reported -- single-step method)

#### G) GLM $\Delta$ Relative Abundance of Peptococcus ~ Response to FMT

Linear Hypotheses:

|                                | Estimate | Std. Error | z value | Pr(> z ) |
|--------------------------------|----------|------------|---------|----------|
| Responder - Non-Responder == 0 | -0.3941  | 0.1572     | -2.506  | 0.0122 * |

---

Signif. codes: 0 '\*\*\*' 0.001 '\*\*' 0.01 '\*' 0.05 '.' 0.1 ' ' 1

(Adjusted p values reported -- single-step method)

#### H) GLM $\Delta$ Relative Abundance of Ruminococcus ~ Response to FMT

Linear Hypotheses:

|                                | Estimate | Std. Error | z value | Pr(> z ) |
|--------------------------------|----------|------------|---------|----------|
| Responder - Non-Responder == 0 | -2.1334  | 0.9945     | -2.145  | 0.0319 * |

---

Signif. codes: 0 '\*\*\*' 0.001 '\*\*' 0.01 '\*' 0.05 '.' 0.1 ' ' 1

(Adjusted p values reported -- single-step method)

#### I) GLM $\Delta$ Relative Abundance of Negativibacillus ~ Prior antibiotic use

Linear Hypotheses:

|               | Estimate | Std. Error | z value | Pr(> z ) |
|---------------|----------|------------|---------|----------|
| Yes - No == 0 | -1.0947  | 0.5276     | -2.075  | 0.038 *  |

---

Signif. codes: 0 '\*\*\*' 0.001 '\*\*' 0.01 '\*' 0.05 '.' 0.1 ' ' 1

(Adjusted p values reported -- single-step method)

**J) GLM  $\Delta$  Relative Abundance of Peptoclostridium ~ diet (dry kibble consumption)**

Linear Hypotheses:

|               | Estimate | Std. Error | z value | Pr(> z ) |
|---------------|----------|------------|---------|----------|
| Yes - No == 0 | -3.470   | 1.834      | -1.892  | 0.0585 . |

---

Signif. codes: 0 '\*\*\*' 0.001 '\*\*' 0.01 '\*' 0.05 '.' 0.1 ' ' 1  
(Adjusted p values reported -- single-step method)

**K) GLM  $\Delta$  Relative Abundance of Subdoligranulum ~ diet (dry kibble consumption)**

Linear Hypotheses:

|               | Estimate | Std. Error | z value | Pr(> z ) |
|---------------|----------|------------|---------|----------|
| Yes - No == 0 | -1.1032  | 0.5046     | -2.186  | 0.0288 * |

---

Signif. codes: 0 '\*\*\*' 0.001 '\*\*' 0.01 '\*' 0.05 '.' 0.1 ' ' 1  
(Adjusted p values reported -- single-step method)

**L) GLM  $\Delta$  Relative Abundance of Desulfovibrio ~ clinical signs**

Linear Hypotheses:

|                                | Estimate | Std. Error | z value | Pr(> z )   |
|--------------------------------|----------|------------|---------|------------|
| Diarrhea - Constipation == 0   | -0.13716 | 0.36311    | -0.378  | 0.98091    |
| VomConstip - Constipation == 0 | 1.43156  | 0.51011    | 2.806   | 0.02418 *  |
| VomDiarr - Constipation == 0   | -0.18558 | 0.37654    | -0.493  | 0.95920    |
| VomConstip - Diarrhea == 0     | 1.56872  | 0.45631    | 3.438   | 0.00315 ** |
| VomDiarr - Diarrhea == 0       | -0.04842 | 0.28311    | -0.171  | 0.99815    |
| VomDiarr - VomConstip == 0     | -1.61714 | 0.47991    | -3.370  | 0.00384 ** |

---

Signif. codes: 0 '\*\*\*' 0.001 '\*\*' 0.01 '\*' 0.05 '.' 0.1 ' ' 1  
(Adjusted p values reported -- single-step method)



#### M) GLM $\Delta$ Relative Abundance of *Veillonella* ~ response to FMT

Linear Hypotheses:

|                                | Estimate  | Std. Error | z value | Pr(> z ) |
|--------------------------------|-----------|------------|---------|----------|
| Responder - Non-Responder == 0 | -0.013494 | 0.007379   | -1.829  | 0.0675 . |

---

Signif. codes: 0 '\*\*\*' 0.001 '\*\*' 0.01 '\*' 0.05 '.' 0.1 ' ' 1

(Adjusted p values reported -- single-step method)

#### N) GLM $\Delta$ Relative Abundance of *Desulfovibrio* ~ prior antibiotic use

Linear Hypotheses:

|               | Estimate | Std. Error | z value | Pr(> z ) |
|---------------|----------|------------|---------|----------|
| Yes - No == 0 | -0.4849  | 0.2548     | -1.903  | 0.057 .  |

---

Signif. codes: 0 '\*\*\*' 0.001 '\*\*' 0.01 '\*' 0.05 '.' 0.1 ' ' 1

(Adjusted p values reported -- single-step method)

#### O) GLM $\Delta$ Relative Abundance of *Escherichia* ~ prior antibiotic use

Linear Hypotheses:

|               | Estimate | Std. Error | z value | Pr(> z ) |
|---------------|----------|------------|---------|----------|
| Yes - No == 0 | -2.025   | 1.027      | -1.972  | 0.0486 * |

---

Signif. codes: 0 '\*\*\*' 0.001 '\*\*' 0.01 '\*' 0.05 '.' 0.1 ' ' 1

(Adjusted p values reported -- single-step method)
